# Supplementary material
Source: Springer Nature journal article supplement (https://www.springermedizin.de/resource/supplementary/12955_2003_64_MOESM1_ESM.pdf/9558482)

**Step 1.  
Item generation**

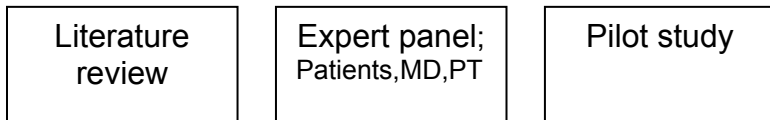

**Step 2.  
Linguistic validation**

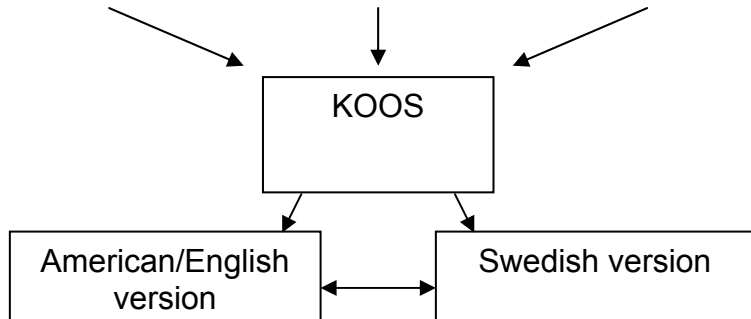

**&**

**Cultural adaptation**

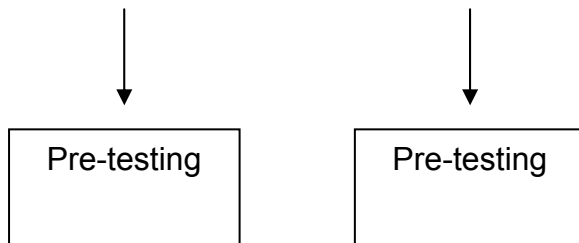

**Step 3.  
Evaluation**

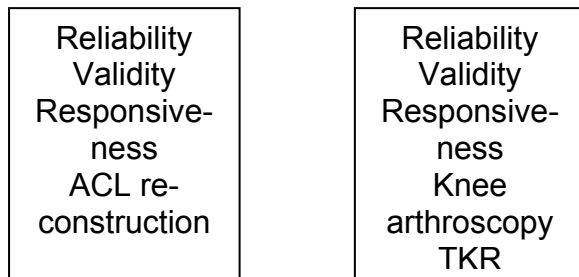

Supplement: MOESM1 [file 9558482]
